# Supplementary material for: Cockroaches Probably Cleaned Up after Dinosaurs
Source: PubMed Central journal article supplement (PMC3851186; doi:10.1371/journal.pone.0080560), 2013-12-04

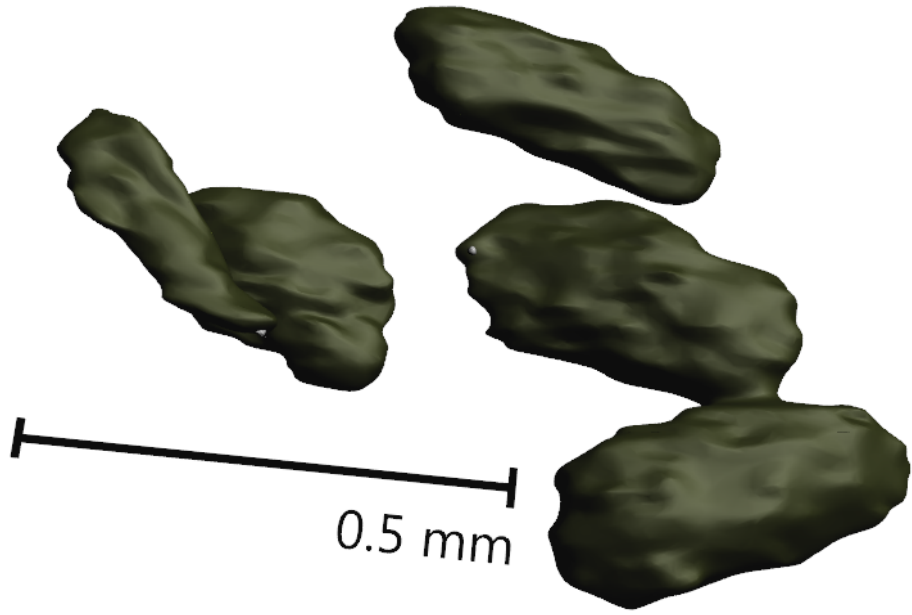

Supplement: pone.0080560.s001.pdf [file pone.0080560.s001.pdf]
